# Supplementary material
Source: publisher figshare collection journal article supplement (https://gsapubs.figshare.com/articles/dataset/_/16654990)
Supplement: Supplementary file 1 [file 1]

Archive with 3 entries (3 files):
- 546-09-SuppFig1.pdf
- 546-09-SuppMat.pdf
- 546-09-SuppTab1-SuppTab6.pdf
