# Supplementary material
Source: publisher figshare collection journal article supplement (https://gsapubs.figshare.com/articles/dataset/_/16654990)
Supplement: Supplementary file 1 [file 1 › 546-09-SuppTab1-SuppTab6.pdf]

TABLE S1. RESULTS OF THE QUARTZ-FELDSPAR-LITHIC DISCRIMINATION

| ID     | F  | L  | Q  | %   | Age             |
|--------|----|----|----|-----|-----------------|
| P4705  | 7  | 21 | 72 | 100 | Miocene         |
| P5435  | 15 | 15 | 70 | 100 | Oligocene       |
| P7145  | 16 | 20 | 64 | 100 | Paleocene       |
| P7215  | 15 | 25 | 60 | 100 | Paleocene       |
| P7255  | 28 | 23 | 49 | 100 | Paleocene       |
| P7310  | 18 | 41 | 41 | 100 | Paleocene       |
|        |    |    |    |     |                 |
| A3220  | 10 | 25 | 65 | 100 | Oligocene       |
| A3480  | 10 | 30 | 60 | 100 | Oligocene       |
| A3890  | 12 | 33 | 55 | 100 | Eocene (Upper)  |
| A4550  | 18 | 25 | 57 | 100 | Eocene (Middle) |
|        |    |    |    |     |                 |
| Ch2635 | 17 | 16 | 67 | 100 | Miocene         |
| Ch2640 | 21 | 15 | 64 | 100 | Miocene         |
| Ch3070 | 25 | 9  | 66 | 100 | Oligocene       |
| Ch3215 | 25 | 14 | 61 | 100 | Eocene (Upper)  |
| Ch3225 | 10 | 80 | 10 | 100 | Eocene (Middle) |
|        |    |    |    |     |                 |
| Ku3100 | 45 | 6  | 49 | 100 | Miocene         |
| Ku3340 | 11 | 34 | 55 | 100 | Miocene         |
| Ku3685 | 30 | 16 | 54 | 100 | Miocene         |
| Ku4030 | 30 | 15 | 55 | 100 | Miocene         |
| Ku4190 | 13 | 12 | 75 | 100 | Miocene         |
| Ku4440 | 34 | 15 | 51 | 100 | Miocene         |
|        |    |    |    |     |                 |
| Ka1640 | 45 | 3  | 52 | 100 | Miocene         |
| Ka1930 | 20 | 13 | 67 | 100 | Miocene         |
| Ka2370 | 55 | 5  | 40 | 100 | Miocene         |
| Ka2605 | 25 | 20 | 55 | 100 | Miocene         |
| Ka3720 | 29 | 25 | 46 | 100 | Oligocene       |
| Ka4860 | 20 | 15 | 65 | 100 | Eocene (Upper)  |





|                          |       |       |        |        |        |      |
|--------------------------|-------|-------|--------|--------|--------|------|
| Concordant P7255_32.FIN2 | 2.063 | 0.033 | 0.1871 | 0.0029 | 0.4009 | 5.34 |
|--------------------------|-------|-------|--------|--------|--------|------|





|                           |       |      |        |        |        |     |
|---------------------------|-------|------|--------|--------|--------|-----|
| Concordant TA1-P5370M - 2 | 2.007 | 0.05 | 0.1878 | 0.0035 | 0.7815 | 5.3 |
|---------------------------|-------|------|--------|--------|--------|-----|



|                           |        |        |        |        |         |          |          |         |         |          |        |     |      |     |      |     |       |      |       |      |        |      |
|---------------------------|--------|--------|--------|--------|---------|----------|----------|---------|---------|----------|--------|-----|------|-----|------|-----|-------|------|-------|------|--------|------|
| Concordant TA2-P4715 - 52 | 0.1126 | 0.0033 | 0.0168 | 0.0003 | 0.1629  | 59.4884  | 0.920106 | 0.0487  | 0.0012  | 0.22584  | 107.5  | 1.6 | 108  | 3   | 134  | 55  | 443   | 0.86 | 0.7%  | 1.5% | 107.5  | 1.6  |
| Concordant TA2-P4715 - 27 | 0.1164 | 0.01   | 0.0171 | 0.0003 | 0.1723  | 58.44535 | 0.853965 | 0.0487  | 0.0049  | 0.42886  | 109.4  | 1.6 | 112  | 9.1 | 133  | 160 | 295   | 0.89 | 2.2%  | 1.5% | 109.4  | 1.6  |
| Concordant TA2-P4715 - 65 | 0.1435 | 0.0089 | 0.0206 | 0.0003 | 0.0421  | 48.61449 | 0.779912 | 0.0505  | 0.0035  | 0.33242  | 131.3  | 2.1 | 136  | 7.8 | 217  | 130 | 423   | 0.62 | 3.7%  | 1.6% | 131.3  | 2.1  |
| Concordant TA2-P4715 - 22 | 0.1474 | 0.006  | 0.0213 | 0.0003 | -0.0871 | 46.86036 | 0.680727 | 0.0501  | 0.002   | 0.31479  | 136.1  | 2   | 140  | 5.3 | 191  | 86  | 194   | 0.56 | 2.5%  | 1.5% | 136.1  | 2.0  |
| Concordant TA2-P4715 - 78 | 0.1669 | 0.0092 | 0.0245 | 0.0004 | 0.4748  | 40.81633 | 0.59975  | 0.0491  | 0.0024  | 0.23618  | 156.1  | 2.3 | 157  | 7.8 | 149  | 100 | 593   | 0.66 | 0.4%  | 1.5% | 156.1  | 2.3  |
| Concordant TA2-P4715 - 42 | 0.1847 | 0.0056 | 0.026  | 0.0004 | 0.7244  | 38.47634 | 0.651389 | 0.05213 | 0.00096 | 0.089255 | 165.4  | 2.8 | 172  | 4.8 | 297  | 45  | 612   | 0.46 | 4.0%  | 1.7% | 165.4  | 2.8  |
| Concordant TA2-P4715 - 11 | 0.4    | 0.041  | 0.0503 | 0.001  | 0.2183  | 19.88072 | 0.395243 | 0.0578  | 0.0056  | 0.021969 | 316.4  | 6.2 | 340  | 28  | 470  | 170 | 15.28 | 0.56 | 7.5%  | 2.0% | 316.4  | 6.2  |
| Concordant TA2-P4715 - 68 | 0.66   | 0.016  | 0.0823 | 0.0013 | 0.2472  | 12.15067 | 0.19193  | 0.0583  | 0.0012  | 0.38571  | 509.8  | 7.7 | 514  | 9.6 | 538  | 44  | 151   | 1.18 | 0.9%  | 1.5% | 509.8  | 7.7  |
| Concordant TA2-P4715 - 3  | 0.728  | 0.036  | 0.085  | 0.0028 | 0.3505  | 11.76471 | 0.387543 | 0.0617  | 0.0012  | 0.3992   | 525.6  | 17  | 555  | 20  | 663  | 41  | 285   | 0.06 | 5.7%  | 3.2% | 525.6  | 17.0 |
| Concordant TA2-P4715 - 91 | 0.747  | 0.036  | 0.0867 | 0.0013 | 0.171   | 11.52871 | 0.172784 | 0.0629  | 0.0027  | 0.27122  | 536.2  | 7.8 | 567  | 19  | 703  | 76  | 293   | 1.24 | 5.7%  | 1.5% | 536.2  | 7.8  |
| Concordant TA2-P4715 - 18 | 0.849  | 0.02   | 0.0955 | 0.0013 | 0.5971  | 10.4723  | 0.14257  | 0.06471 | 0.001   | -0.16007 | 587.9  | 7.4 | 624  | 11  | 763  | 34  | 194   | 1.28 | 6.1%  | 1.3% | 587.9  | 7.4  |
| Concordant TA2-P4715 - 36 | 1.325  | 0.032  | 0.1398 | 0.0022 | 0.4626  | 7.153076 | 0.112566 | 0.069   | 0.0013  | 0.14916  | 843.6  | 12  | 856  | 14  | 896  | 39  | 140.8 | 0.56 | 1.5%  | 1.4% | 896.0  | 39.0 |
| Concordant TA2-P4715 - 83 | 1.806  | 0.035  | 0.1771 | 0.0025 | 0.4247  | 5.646527 | 0.079708 | 0.07431 | 0.001   | 0.49972  | 1051   | 14  | 1047 | 13  | 1052 | 29  | 195   | 0.35 | -0.3% | 1.3% | 1052.0 | 29.0 |
| Concordant TA2-P4715 - 89 | 1.811  | 0.041  | 0.1749 | 0.0024 | 0.5761  | 5.717553 | 0.078457 | 0.0749  | 0.0013  | 0.29761  | 1039   | 13  | 1049 | 14  | 1065 | 33  | 105.2 | 0.77 | 1.0%  | 1.3% | 1065.0 | 33.0 |
| Concordant TA2-P4715 - 84 | 1.915  | 0.037  | 0.1838 | 0.0028 | 0.5082  | 5.440696 | 0.082883 | 0.07601 | 0.00083 | 0.33523  | 1088   | 15  | 1086 | 13  | 1095 | 22  | 740   | 0.04 | -0.2% | 1.4% | 1095.0 | 22.0 |
| Concordant TA2-P4715 - 5  | 2.1    | 0.042  | 0.1935 | 0.0028 | 0.6156  | 5.167959 | 0.074782 | 0.07801 | 0.001   | 0.26879  | 1140.2 | 15  | 1149 | 14  | 1146 | 26  | 247   | 0.36 | 0.7%  | 1.3% | 1146.0 | 26.0 |
| Concordant TA2-P4715 - 79 | 2.132  | 0.045  | 0.1966 | 0.0034 | 0.8371  | 5.08647  | 0.087965 | 0.0793  | 0.001   | 0.31893  | 1157   | 19  | 1159 | 14  | 1179 | 25  | 470   | 0.37 | 0.2%  | 1.6% | 1179.0 | 25.0 |
| Concordant TA2-P4715 - 66 | 2.437  | 0.051  | 0.2123 | 0.0032 | 0.4485  | 4.710316 | 0.070999 | 0.0833  | 0.0013  | 0.33688  | 1241   | 17  | 1253 | 15  | 1279 | 32  | 145.3 | 0.30 | 1.0%  | 1.4% | 1279.0 | 32.0 |
| Concordant TA2-P4715 - 35 | 2.611  | 0.079  | 0.2196 | 0.0046 | 0.295   | 4.553734 | 0.095388 | 0.0867  | 0.0013  | 0.49173  | 1279   | 24  | 1304 | 23  | 1353 | 29  | 174.9 | 0.50 | 1.9%  | 1.9% | 1353.0 | 29.0 |
| Concordant TA2-P4715 - 56 | 2.658  | 0.05   | 0.2223 | 0.0032 | 0.5515  | 4.498426 | 0.064755 | 0.0872  | 0.0011  | 0.56684  | 1294   | 17  | 1317 | 13  | 1364 | 24  | 214.7 | 1.02 | 1.7%  | 1.3% | 1364.0 | 24.0 |
| Concordant TA2-P4715 - 74 | 3.127  | 0.062  | 0.2543 | 0.0038 | 0.6005  | 3.932363 | 0.058761 | 0.08963 | 0.0012  | 0.095771 | 1460.8 | 20  | 1439 | 16  | 1417 | 26  | 115.2 | 0.72 | -1.5% | 1.4% | 1417.0 | 26.0 |
| Concordant TA2-P4715 - 19 | 3.371  | 0.067  | 0.2635 | 0.0037 | 0.6452  | 3.795066 | 0.053289 | 0.09323 | 0.001   | 0.19369  | 1508   | 19  | 1498 | 15  | 1492 | 21  | 354   | 0.29 | -0.7% | 1.3% | 1492.0 | 21.0 |
| Concordant TA2-P4715 - 85 | 3.299  | 0.072  | 0.257  | 0.0036 | 0.5122  | 3.891051 | 0.054505 | 0.0938  | 0.0015  | 0.23261  | 1474   | 19  | 1480 | 17  | 1502 | 29  | 65.4  | 0.58 | 0.4%  | 1.3% | 1502.0 | 29.0 |
| Concordant TA2-P4715 - 54 | 3.488  | 0.069  | 0.2631 | 0.004  | 0.7489  | 3.800836 | 0.057785 | 0.09634 | 0.0012  | 0.34871  | 1506   | 20  | 1524 | 16  | 1556 | 22  | 1238  | 0.09 | 1.2%  | 1.3% | 1556.0 | 22.0 |
| Concordant TA2-P4715 - 53 | 4.76   | 0.1    | 0.3324 | 0.0063 | 0.9928  | 3.008424 | 0.057019 | 0.10431 | 0.0011  | 0.20186  | 1850   | 30  | 1777 | 18  | 1702 | 20  | 778   | 0.41 | -3.9% | 1.6% | 1702.0 | 20.0 |
| Concordant TA2-P4715 - 77 | 4.57   | 0.089  | 0.3141 | 0.0044 | 0.6802  | 3.183699 | 0.044598 | 0.10531 | 0.0012  | 0.22526  | 1761   | 22  | 1744 | 16  | 1719 | 22  | 113.9 | 1.31 | -1.0% | 1.2% | 1719.0 | 22.0 |
| Concordant TA2-P4715 - 38 | 4.266  | 0.11   | 0.2872 | 0.0057 | 0.8964  | 3.481894 | 0.069104 | 0.10798 | 0.0012  | -0.06524 | 1628   | 28  | 1687 | 20  | 1765 | 19  | 420   | 0.71 | 3.6%  | 1.7% | 1765.0 | 19.0 |
| Concordant TA2-P4715 - 44 | 4.754  | 0.093  | 0.319  | 0.0047 | 0.7899  | 3.134796 | 0.046187 | 0.10902 | 0.0012  | 0.26986  | 1785   | 23  | 1777 | 16  | 1785 | 19  | 260   | 0.29 | -0.5% | 1.3% | 1785.0 | 19.0 |
| Concordant TA2-P4715 - 16 | 5.058  | 0.093  | 0.3289 | 0.0045 | 0.7367  | 3.040438 | 0.041599 | 0.11114 | 0.0012  | 0.25378  | 1833   | 22  | 1829 | 16  | 1818 | 20  | 318   | 0.75 | -0.2% | 1.2% | 1818.0 | 20.0 |
| Concordant TA2-P4715 - 45 | 6.456  | 0.13   | 0.3675 | 0.0049 | 0.6638  | 2.721088 | 0.036281 | 0.1278  | 0.0016  | 0.042104 | 2017   | 23  | 2040 | 17  | 2067 | 23  | 94.6  | 1.11 | 1.1%  | 1.1% | 2067.0 | 23.0 |

HD = High Discordance. >50% young, >5% old  
HE = High 6/8 error. >5%











|            |              |       |       |        |        |        |           |
|------------|--------------|-------|-------|--------|--------|--------|-----------|
| Concordant | TA4_A3845_31 | 2.399 | 0.044 | 0.2137 | 0.0029 | 0.6769 | 4.67946</ |
|------------|--------------|-------|-------|--------|--------|--------|-----------|



TABLE S3. Aktum-1 LA-ICP-MS DATA

|            |                |       |       |        |        |        |         |         |         |         |         |          |
|------------|----------------|-------|-------|--------|--------|--------|---------|---------|---------|---------|---------|----------|
| Concordant | TA3-A3480 - 19 | 1.808 | 0.033 | 0.1763 | 0.0025 | 0.6108 | 5.67215 | 0.08043 | 0.07463 | 0.00098 | 0.26835 | 1046.8</ |
|------------|----------------|-------|-------|--------|--------|--------|---------|---------|---------|---------|---------|----------|



TABLE S4. KunaH-1 LA-ICP-MS DATA

|            |               |       |       |        |        |          |    |
|------------|---------------|-------|-------|--------|--------|----------|----|
| Concordant | TA4_Ku4440_41 | 0.287 | 0.012 | 0.0404 | 0.0008 | 0.037115 | 24 |
|------------|---------------|-------|-------|--------|--------|----------|----|





TABLE S4. Kunah-1 LA-ICP-MS DATA

|            |               |       |       |        |        |         |         |
|------------|---------------|-------|-------|--------|--------|---------|---------|
| Concordant | TA4_Ku3845_72 | 2.583 | 0.061 | 0.2131 | 0.0041 | 0.45783 | 4.69263 |
|------------|---------------|-------|-------|--------|--------|---------|---------|





TABLE S4. Kunah-1 LA-ICP-MS DATA

|            |                 |       |      |        |        |         |           |           |        |        |         |      |    |      |  |
|------------|-----------------|-------|------|--------|--------|---------|-----------|-----------|--------|--------|---------|------|----|------|--|
| Concordant | TA6-Ku3100 - 78 | 3.517 | 0.08 | 0.2706 | 0.0047 | 0.48676 | 3.6954915 | 0.0641863 | 0.0952 | 0.0015 | 0.27151 | 1544 | 24 | 1533 |  |
|------------|-----------------|-------|------|--------|--------|---------|-----------|-----------|--------|--------|---------|------|----|------|--|







|  |  | Final207_ |  |  |  |  | Final206_ |  |  |  |  | Final203_ |  |  |  |  | Final202_ |  |  |  |  | Final201_ |  |  |  |  | Final200_ |  |  |  |  | Final199_ |  |  |  |  | Final198_ |  |  |  |  | Final197_ |  |  |  |  | Final196_ |  |  |  |  | Final195_ |  |  |  |  | Final194_ |  |  |  |  | Final193_ |  |  |  |  | Final192_ |  |  |  |  | Final191_ |  |  |  |  | Final190_ |  |  |  |  | Final189_ |  |  |  |  | Final188_ |  |  |  |  | Final187_ |  |  |  |  | Final186_ |  |  |  |  | Final185_ |  |  |  |  | Final184_ |  |  |  |  | Final183_ |  |  |  |  | Final182_ |  |  |  |  | Final181_ |  |  |  |  | Final180_ |  |  |  |  | Final179_ |  |  |  |  | Final178_ |  |  |  |  | Final177_ |  |  |  |  | Final176_ |  |  |  |  | Final175_ |  |  |  |  | Final174_ |  |  |  |  | Final173_ |  |  |  |  | Final172_ |  |  |  |  | Final171_ |  |  |  |  | Final170_ |  |  |  |  | Final169_ |  |  |  |  | Final168_ |  |  |  |  | Final167_ |  |  |  |  | Final166_ |  |  |  |  | Final165_ |  |  |  |  | Final164_ |  |  |  |  | Final163_ |  |  |  |  | Final162_ |  |  |  |  | Final161_ |  |  |  |  | Final160_ |  |  |  |  | Final159_ |  |  |  |  | Final158_ |  |  |  |  | Final157_ |  |  |  |  | Final156_ |  |  |  |  | Final155_ |  |  |  |  | Final154_ |  |  |  |  | Final153_ |  |  |  |  | Final152_ |  |  |  |  | Final151_ |  |  |  |  | Final150_ |  |  |  |  | Final149_ |  |  |  |  | Final148_ |  |  |  |  | Final147_ |  |  |  |  | Final146_ |  |  |  |  | Final145_ |  |  |  |  | Final144_ |  |  |  |  | Final143_ |  |  |  |  | Final142_ |  |  |  |  | Final141_ |  |  |  |  | Final140_ |  |  |  |  | Final139_ |  |  |  |  | Final138_ |  |  |  |  | Final137_ |  |  |  |  | Final136_ |  |  |  |  | Final135_ |  |  |  |  | Final134_ |  |  |  |  | Final133_ |  |  |  |  | Final132_ |  |  |  |  | Final131_ |  |  |  |  | Final130_ |  |  |  |  | Final129_ |  |  |  |  | Final128_ |  |  |  |  | Final127_ |  |  |  |  | Final126_ |  |  |  |  | Final125_ |  |  |  |  | Final124_ |  |  |  |  | Final123_ |  |  |  |  | Final122_ |  |  |  |  | Final121_ |  |  |  |  | Final120_ |  |  |  |  | Final119_ |  |  |  |  | Final118_ |  |  |  |  | Final117_ |  |  |  |  | Final116_ |  |  |  |  | Final115_ |  |  |  |  | Final114_ |  |  |  |  | Final113_ |  |  |  |  | Final112_ |  |  |  |  | Final111_ |  |  |  |  | Final110_ |  |  |  |  | Final109_ |  |  |  |  | Final108_ |  |  |  |  | Final107_ |  |  |  |  | Final106_ |  |  |  |  | Final105_ |  |  |  |  | Final104_ |  |  |  |  | Final103_ |  |  |  |  | Final102_ |  |  |  |  | Final101_ |  |  |  |  | Final100_ |  |  |  |  | Final99_ |  |  |  |  | Final98_ |  |  |  |  | Final97_ |  |  |  |  | Final96_ |  |  |  |  | Final95_ |  |  |  |  | Final94_ |  |  |  |  | Final93_ |  |  |  |  | Final92_ |  |  |  |  | Final91_ |  |  |  |  | Final90_ |  |  |  |  | Final89_ |  |  |  |  | Final88_ |  |  |  |  | Final87_ |  |  |  |  | Final86_ |  |  |  |  | Final85_ |  |  |  |  | Final84_ |  |  |  |  | Final83_ |  |  |  |  | Final82_ |  |  |  |  | Final81_ |  |  |  |  | Final80_ |  |  |  |  |
|--|--|-----------|--|--|--|--|-----------|--|--|--|--|-----------|--|--|--|--|-----------|--|--|--|--|-----------|--|--|--|--|-----------|--|--|--|--|-----------|--|--|--|--|-----------|--|--|--|--|-----------|--|--|--|--|-----------|--|--|--|--|-----------|--|--|--|--|-----------|--|--|--|--|-----------|--|--|--|--|-----------|--|--|--|--|-----------|--|--|--|--|-----------|--|--|--|--|-----------|--|--|--|--|-----------|--|--|--|--|-----------|--|--|--|--|-----------|--|--|--|--|-----------|--|--|--|--|-----------|--|--|--|--|-----------|--|--|--|--|-----------|--|--|--|--|-----------|--|--|--|--|-----------|--|--|--|--|-----------|--|--|--|--|-----------|--|--|--|--|-----------|--|--|--|--|-----------|--|--|--|--|-----------|--|--|--|--|-----------|--|--|--|--|-----------|--|--|--|--|-----------|--|--|--|--|-----------|--|--|--|--|-----------|--|--|--|--|-----------|--|--|--|--|-----------|--|--|--|--|-----------|--|--|--|--|-----------|--|--|--|--|-----------|--|--|--|--|-----------|--|--|--|--|-----------|--|--|--|--|-----------|--|--|--|--|-----------|--|--|--|--|-----------|--|--|--|--|-----------|--|--|--|--|-----------|--|--|--|--|-----------|--|--|--|--|-----------|--|--|--|--|-----------|--|--|--|--|-----------|--|--|--|--|-----------|--|--|--|--|-----------|--|--|--|--|-----------|--|--|--|--|-----------|--|--|--|--|-----------|--|--|--|--|-----------|--|--|--|--|-----------|--|--|--|--|-----------|--|--|--|--|-----------|--|--|--|--|-----------|--|--|--|--|-----------|--|--|--|--|-----------|--|--|--|--|-----------|--|--|--|--|-----------|--|--|--|--|-----------|--|--|--|--|-----------|--|--|--|--|-----------|--|--|--|--|-----------|--|--|--|--|-----------|--|--|--|--|-----------|--|--|--|--|-----------|--|--|--|--|-----------|--|--|--|--|-----------|--|--|--|--|-----------|--|--|--|--|-----------|--|--|--|--|-----------|--|--|--|--|-----------|--|--|--|--|-----------|--|--|--|--|-----------|--|--|--|--|-----------|--|--|--|--|-----------|--|--|--|--|-----------|--|--|--|--|-----------|--|--|--|--|-----------|--|--|--|--|-----------|--|--|--|--|-----------|--|--|--|--|-----------|--|--|--|--|-----------|--|--|--|--|-----------|--|--|--|--|-----------|--|--|--|--|-----------|--|--|--|--|-----------|--|--|--|--|-----------|--|--|--|--|-----------|--|--|--|--|-----------|--|--|--|--|-----------|--|--|--|--|-----------|--|--|--|--|-----------|--|--|--|--|-----------|--|--|--|--|-----------|--|--|--|--|-----------|--|--|--|--|-----------|--|--|--|--|-----------|--|--|--|--|-----------|--|--|--|--|----------|--|--|--|--|----------|--|--|--|--|----------|--|--|--|--|----------|--|--|--|--|----------|--|--|--|--|----------|--|--|--|--|----------|--|--|--|--|----------|--|--|--|--|----------|--|--|--|--|----------|--|--|--|--|----------|--|--|--|--|----------|--|--|--|--|----------|--|--|--|--|----------|--|--|--|--|----------|--|--|--|--|----------|--|--|--|--|----------|--|--|--|--|----------|--|--|--|--|----------|--|--|--|--|----------|--|--|--|--|
|--|--|-----------|--|--|--|--|-----------|--|--|--|--|-----------|--|--|--|--|-----------|--|--|--|--|-----------|--|--|--|--|-----------|--|--|--|--|-----------|--|--|--|--|-----------|--|--|--|--|-----------|--|--|--|--|-----------|--|--|--|--|-----------|--|--|--|--|-----------|--|--|--|--|-----------|--|--|--|--|-----------|--|--|--|--|-----------|--|--|--|--|-----------|--|--|--|--|-----------|--|--|--|--|-----------|--|--|--|--|-----------|--|--|--|--|-----------|--|--|--|--|-----------|--|--|--|--|-----------|--|--|--|--|-----------|--|--|--|--|-----------|--|--|--|--|-----------|--|--|--|--|-----------|--|--|--|--|-----------|--|--|--|--|-----------|--|--|--|--|-----------|--|--|--|--|-----------|--|--|--|--|-----------|--|--|--|--|-----------|--|--|--|--|-----------|--|--|--|--|-----------|--|--|--|--|-----------|--|--|--|--|-----------|--|--|--|--|-----------|--|--|--|--|-----------|--|--|--|--|-----------|--|--|--|--|-----------|--|--|--|--|-----------|--|--|--|--|-----------|--|--|--|--|-----------|--|--|--|--|-----------|--|--|--|--|-----------|--|--|--|--|-----------|--|--|--|--|-----------|--|--|--|--|-----------|--|--|--|--|-----------|--|--|--|--|-----------|--|--|--|--|-----------|--|--|--|--|-----------|--|--|--|--|-----------|--|--|--|--|-----------|--|--|--|--|-----------|--|--|--|--|-----------|--|--|--|--|-----------|--|--|--|--|-----------|--|--|--|--|-----------|--|--|--|--|-----------|--|--|--|--|-----------|--|--|--|--|-----------|--|--|--|--|-----------|--|--|--|--|-----------|--|--|--|--|-----------|--|--|--|--|-----------|--|--|--|--|-----------|--|--|--|--|-----------|--|--|--|--|-----------|--|--|--|--|-----------|--|--|--|--|-----------|--|--|--|--|-----------|--|--|--|--|-----------|--|--|--|--|-----------|--|--|--|--|-----------|--|--|--|--|-----------|--|--|--|--|-----------|--|--|--|--|-----------|--|--|--|--|-----------|--|--|--|--|-----------|--|--|--|--|-----------|--|--|--|--|-----------|--|--|--|--|-----------|--|--|--|--|-----------|--|--|--|--|-----------|--|--|--|--|-----------|--|--|--|--|-----------|--|--|--|--|-----------|--|--|--|--|-----------|--|--|--|--|-----------|--|--|--|--|-----------|--|--|--|--|-----------|--|--|--|--|-----------|--|--|--|--|-----------|--|--|--|--|-----------|--|--|--|--|-----------|--|--|--|--|-----------|--|--|--|--|-----------|--|--|--|--|-----------|--|--|--|--|-----------|--|--|--|--|-----------|--|--|--|--|-----------|--|--|--|--|-----------|--|--|--|--|-----------|--|--|--|--|-----------|--|--|--|--|-----------|--|--|--|--|----------|--|--|--|--|----------|--|--|--|--|----------|--|--|--|--|----------|--|--|--|--|----------|--|--|--|--|----------|--|--|--|--|----------|--|--|--|--|----------|--|--|--|--|----------|--|--|--|--|----------|--|--|--|--|----------|--|--|--|--|----------|--|--|--|--|----------|--|--|--|--|----------|--|--|--|--|----------|--|--|--|--|----------|--|--|--|--|----------|--|--|--|--|----------|--|--|--|--|----------|--|--|--|--|----------|--|--|--|--|





**Table S6. Heavy mineral concentrations of the studied sections. Data plotted in Fig 3-7.**

|           |         | Rutile, Anatase, Brookite,<br>Leucoxene | Ilmenite, Ti-magnetite | Sphene, Perovskite | Magnetite, Hematite,<br>Goethite, Siderite | Zircon | Apatite, Monazite,<br>Vivianite | Pyrite, Sphalerite,<br>Chalcopyrite | Sillimanite, Andalusite,<br>Kyanite, Topaz, Beryl,<br>Spodumene | Epidote | Staurolite, Garnet<br>(Almandine-Pyrope),<br>Chloritoid | Olivine | Andradite (garnet) | Amphibole, Pyroxene,<br>Tourmaline | Corundum | Spinel | Cr-spinel | Ferromanganese | 10-A phyllosilicate group | Other Minerals | TOTAL |
|-----------|---------|-----------------------------------------|------------------------|--------------------|--------------------------------------------|--------|---------------------------------|-------------------------------------|-----------------------------------------------------------------|---------|---------------------------------------------------------|---------|--------------------|------------------------------------|----------|--------|-----------|----------------|---------------------------|----------------|-------|
| PUSKON-1  | P7310HM | 18.9                                    | 15.1                   | 0.0                | 3.8                                        | 7.5    | 1.9                             | 7.5                                 | 0.0                                                             | 0.0     | 15.1                                                    | 0.0     | 0.0                | 28.3                               | 0.0      | 0.0    | 0.0       | 0.0            | 1.9                       | 0.0            | 100.0 |
|           | P7255HM | 10.3                                    | 3.1                    | 0.0                | 11.3                                       | 7.2    | 0.0                             | 8.2                                 | 0.0                                                             | 0.0     | 4.1                                                     | 0.0     | 0.0                | 55.7                               | 0.0      | 0.0    | 0.0       | 0.0            | 0.0                       |                | 100.0 |
|           | P7215HM | 28.3                                    | 17.0                   | 0.0                | 13.2                                       | 3.8    | 1.9                             | 0.0                                 | 0.0                                                             | 0.0     | 5.7                                                     | 0.0     | 0.0                | 22.6                               | 0.0      | 0.0    | 0.0       | 0.0            | 7.5                       | 0.0            | 100.0 |
|           | P7145HM | 10.3                                    | 3.1                    | 0.0                | 11.3                                       | 7.2    | 0.0                             | 8.2                                 | 0.0                                                             | 0.0     | 4.1                                                     | 0.0     | 0.0                | 55.7                               | 0.0      | 0.0    | 0.0       | 0.0            | 0.0                       | 0.0            | 100.0 |
|           | P5435HM | 2.1                                     | 15.8                   | 0.0                | 44.2                                       | 4.2    | 1.1                             | 2.1                                 | 1.1                                                             | 0.0     | 2.1                                                     | 0.0     | 0.0                | 20.0                               | 3.2      | 0.0    | 0.0       | 0.0            | 4.2                       | 0.0            | 100.0 |
|           | P4705HM | 12.3                                    | 6.5                    | 0.0                | 45.5                                       | 9.1    | 9.1                             | 3.9                                 | 0.6                                                             | 0.0     | 1.3                                                     | 0.0     | 0.0                | 5.8                                | 0.6      | 0.0    | 1.9       | 0.0            | 2.6                       | 0.6            | 100.0 |
| AKTUM-1   | A4550HM | 12.5                                    | 8.3                    | 0.0                | 8.3                                        | 25.0   | 0.0                             | 8.3                                 | 0.0                                                             | 0.0     | 12.5                                                    | 0.0     | 0.0                | 20.8                               | 0.0      | 0.0    | 4.2       | 0.0            | 0.0                       | 0.0            | 100.0 |
|           | A3890HM | 18.1                                    | 4.8                    | 0.0                | 37.3                                       | 4.8    | 7.2                             | 0.0                                 | 0.0                                                             | 1.2     | 9.6                                                     | 0.0     | 0.0                | 10.8                               | 0.0      | 0.0    | 2.4       | 0.0            | 3.6                       | 0.0            | 100.0 |
|           | A3480HM | 24.7                                    | 9.6                    | 0.0                | 39.7                                       | 2.5    | 4.6                             | 0.0                                 | 0.0                                                             | 0.4     | 8.8                                                     | 0.0     | 0.8                | 1.3                                | 0.0      | 0.0    | 0.8       | 0.0            | 1.7                       | 5.0            | 100.0 |
|           | A3320HM | 12.7                                    | 6.3                    | 0.0                | 3.2                                        | 6.3    | 4.8                             | 0.0                                 | 0.0                                                             | 0.0     | 7.9                                                     | 0.0     | 0.0                | 44.5                               | 0.0      | 0.0    | 3.2       | 0.0            | 7.9                       | 3.2            | 100.1 |
| KUNAH-1   | 4440HM  | 0.7                                     | 2.7                    | 8.0                | 6.0                                        | 3.3    | 0.7                             | 0.8                                 | 0.0                                                             | 25.5    | 0.0                                                     | 0.0     | 0.0                | 42.4                               | 0.0      | 0.8    | 0.0       | 0.0            | 9.3                       | 0.0            | 100.0 |
|           | 4190HM  | 2.7                                     | 5.3                    | 0.0                | 28.3                                       | 10.3   | 2.6                             | 1.0                                 | 2.4                                                             | 4.4     | 0.0                                                     | 0.0     | 1.2                | 34.7                               | 0.0      | 0.0    | 0.0       | 0.0            | 7.1                       | 0.0            | 100.0 |
|           | 4030HM  | 0.7                                     | 0.0                    | 1.6                | 5.2                                        | 1.6    | 4.7                             | 1.3                                 | 0.7                                                             | 17.7    | 6.4                                                     | 0.0     | 0.0                | 52.3                               | 0.0      | 0.0    | 0.0       | 0.0            | 7.9                       | 0.0            | 100.0 |
|           | 3685HM  | 5.7                                     | 12.7                   | 0.1                | 34.3                                       | 0.4    | 0.1                             | 4.6                                 | 0.2                                                             | 0.0     | 10.2                                                    | 0.0     | 0.0                | 31.6                               | 0.0      | 0.0    | 0.0       | 0.0            | 0.0                       | 0.0            | 100.0 |
|           | 3340HM  | 0.3                                     | 0.0                    | 0.0                | 34.2                                       | 0.0    | 0.0                             | 62.5                                | 0.0                                                             | 0.0     | 0.0                                                     | 0.0     | 1.6                | 1.4                                | 0.0      | 0.0    | 0.0       | 0.0            | 0.0                       | 0.0            | 100.0 |
|           | 3100HM  | 9.8                                     | 4.0                    | 4.3                | 10.7                                       | 1.0    | 5.2                             | 32.3                                | 0.0                                                             | 10.7    | 6.1                                                     | 1.4     | 0.0                | 3.0                                | 0.0      | 0.0    | 0.0       | 0.1            | 10.9                      | 0.6            | 100.0 |
| KABILIL-1 | 4860HM  | 0.0                                     | 0.6                    | 16.4               | 13.5                                       | 0.0    | 0.0                             | 46.8                                | 0.0                                                             | 0.0     | 0.0                                                     | 0.0     | 2.0                | 0.0                                | 0.0      | 0.0    | 2.9       | 0.0            | 17.3                      | 0.5            | 100.0 |
|           | 4280HM  | 2.8                                     | 0.4                    | 0.0                | 0.6                                        | 26.4   | 0.0                             | 59.7                                | 0.0                                                             | 0.0     | 0.0                                                     | 0.0     | 0.0                | 0.0                                | 0.0      | 3.9    | 0.0       | 0.0            | 6.2                       | 0.0            | 100.0 |
|           | 3720HM  | 0.0                                     | 0.0                    | 3.9                | 6.9                                        | 0.0    | 0.0                             | 86.2                                | 0.0                                                             | 0.0     | 0.0                                                     | 0.0     | 0.0                | 0.0                                | 0.0      | 0.0    | 0.0       | 0.0            | 2.9                       | 0.0            | 100.0 |
|           | 2605HM  | 0.0                                     | 0.4                    | 0.0                | 0.8                                        | 0.0    | 0.0                             | 94.7                                | 0.0                                                             | 0.0     | 0.0                                                     | 0.0     | 0.0                | 0.0                                | 0.0      | 0.0    | 2.6       | 0.0            | 1.5                       | 0.0            | 100.0 |
|           | 2370HM  | 6.7                                     | 0.0                    | 0.0                | 0.0                                        | 2.4    | 0.0                             | 54.3                                | 0.0                                                             | 0.0     | 0.0                                                     | 0.0     | 0.0                | 0.0                                | 0.0      | 15.2   | 0.0       | 0.0            | 13.4                      | 7.9            | 100.0 |
|           | 1930HM  | 0.0                                     | 9.4                    | 0.0                | 11.3                                       | 0.8    | 0.9                             | 10.0                                | 0.8                                                             | 0.0     | 0.0                                                     | 0.0     | 0.0                | 8.6                                | 0.0      | 0.8    | 0.0       | 0.0            | 57.5                      | 0.0            | 100.0 |
|           | 1640HM  | 2.9                                     | 0.4                    | 8.2                | 8.1                                        | 26.8   | 5.0                             | 0.2                                 | 0.0                                                             | 6.2     | 4.6                                                     | 1.7     | 0.0                | 20.4                               | 0.0      | 0.0    | 0.0       | 0.0            | 14.7                      | 1.0            | 100.0 |
| CTAH-201  | 3225HM  | 2.9                                     | 0.0                    | 0.0                | 37.3                                       | 3.6    | 9.0                             | 36.4                                | 0.0                                                             | 0.5     | 0.0                                                     | 0.0     | 0.0                | 1.1                                | 0.0      | 0.1    | 0.0       | 0.0            | 9.0                       | 0.0            | 100.0 |
|           | 3215HM  | 5.2                                     | 2.4                    | 0.0                | 7.2                                        | 65.4   | 7.9                             | 0.2                                 | 0.0                                                             | 0.0     | 0.1                                                     | 0.0     | 0.0                | 6.3                                | 0.0      | 0.0    | 0.0       | 0.0            | 4.5                       | 0.7            | 100.0 |
|           | 3070HM  | 0.8                                     | 0.1                    | 0.0                | 1.0                                        | 6.3    | 7.0                             | 78.2                                | 0.0                                                             | 0.0     | 0.6                                                     | 0.0     | 0.3                | 0.0                                | 0.0      | 0.5    | 0.0       | 0.0            | 5.1                       | 0.0            | 100.0 |

|      |        |     |     |     |      |     |     |      |     |     |     |     |     |      |     |     |     |     |      |     |       |
|------|--------|-----|-----|-----|------|-----|-----|------|-----|-----|-----|-----|-----|------|-----|-----|-----|-----|------|-----|-------|
| CHUK | 2640HM | 2.5 | 0.4 | 0.0 | 23.8 | 6.9 | 0.0 | 34.3 | 2.8 | 0.0 | 0.5 | 0.0 | 0.0 | 15.5 | 0.0 | 0.0 | 0.0 | 0.0 | 13.2 | 0.0 | 100.0 |
|      | 2635HM | 5.2 | 0.0 | 0.0 | 53.6 | 2.3 | 0.0 | 35.2 | 0.4 | 0.0 | 0.1 | 0.0 | 0.0 | 2.0  | 0.0 | 0.0 | 0.0 | 0.0 | 1.2  | 0.0 | 100.0 |
