# Supplementary material
Source: publisher figshare collection journal article supplement (https://gsapubs.figshare.com/articles/dataset/_/16654990)

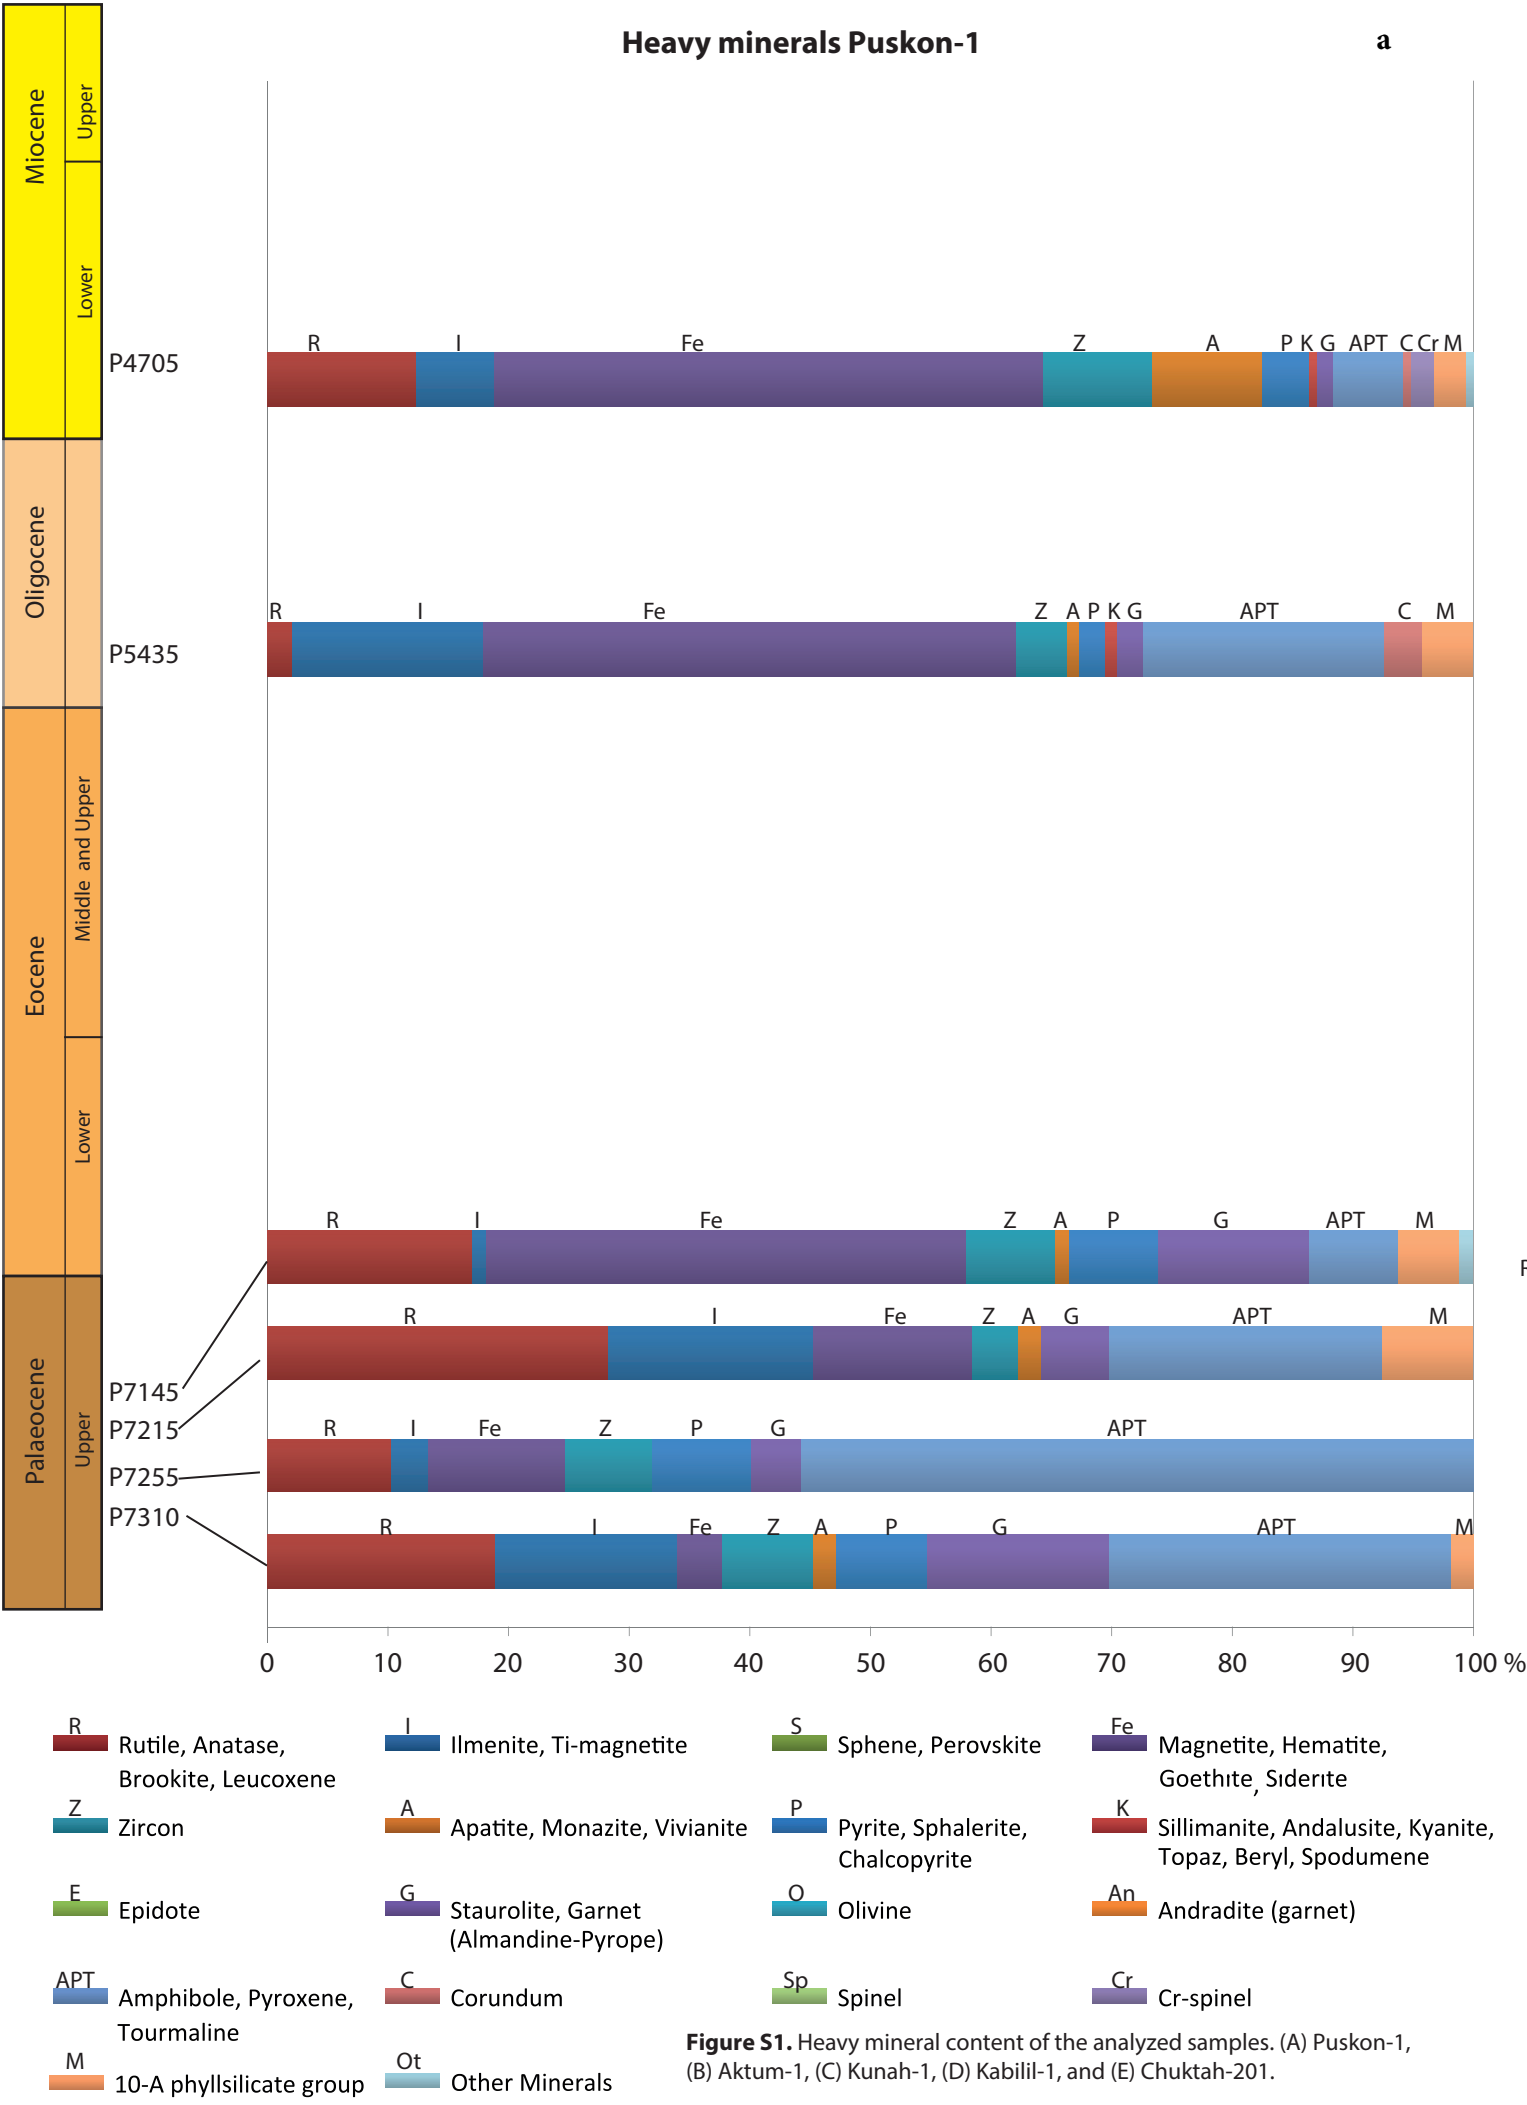

# Heavy minerals Aktum-1

b

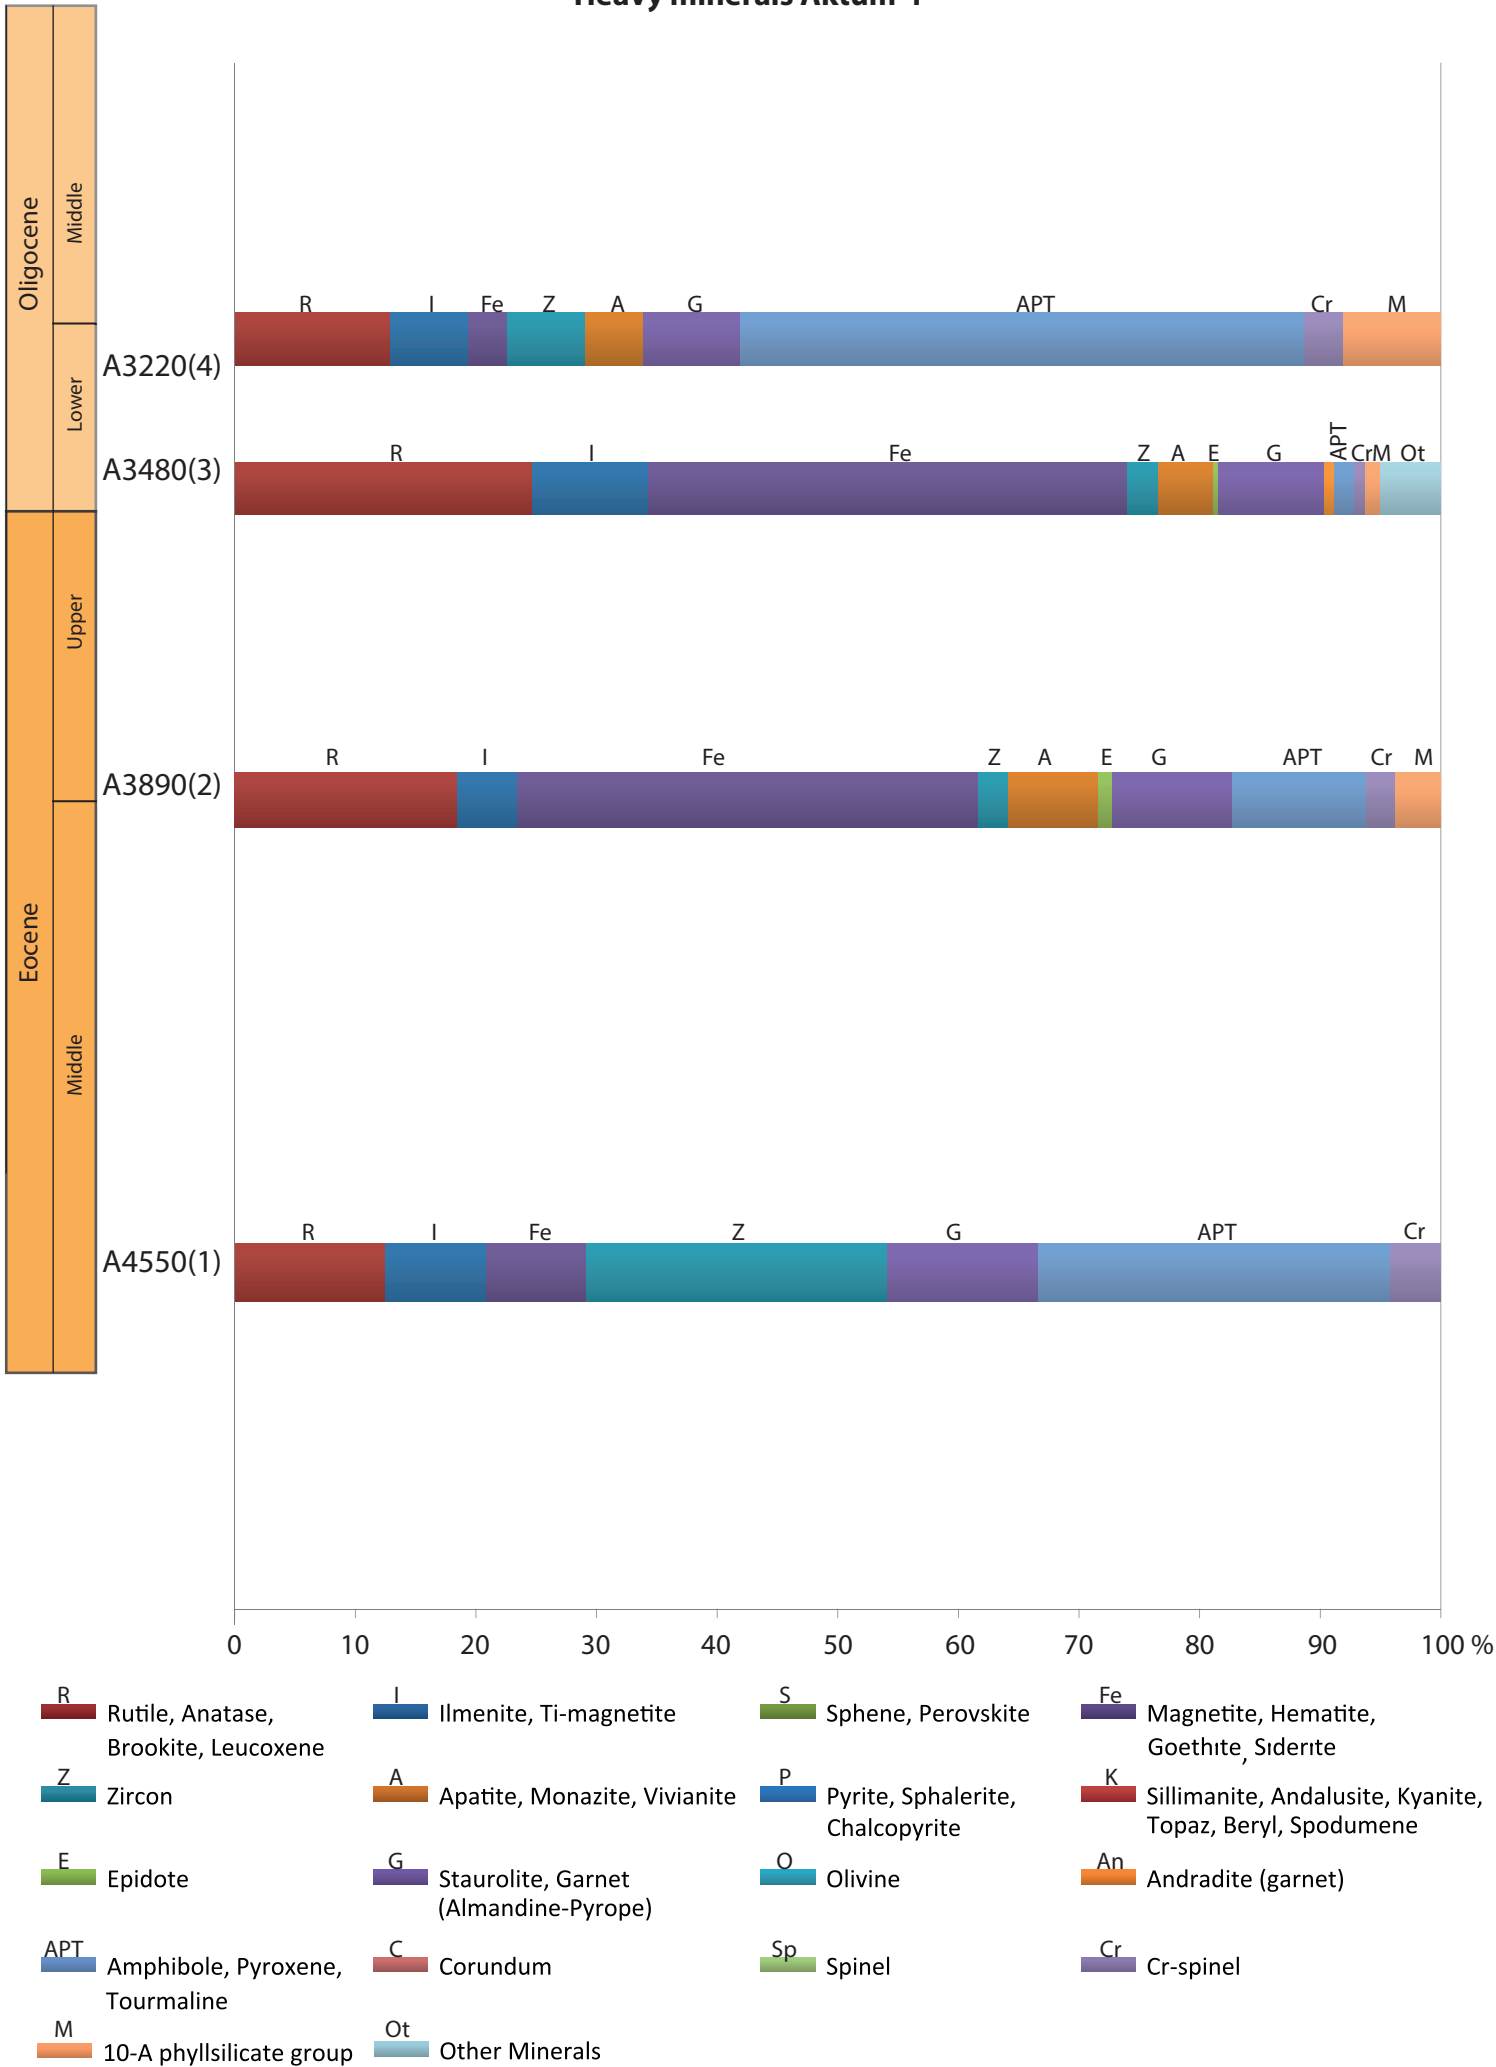

# Heavy minerals Kunah-1

c

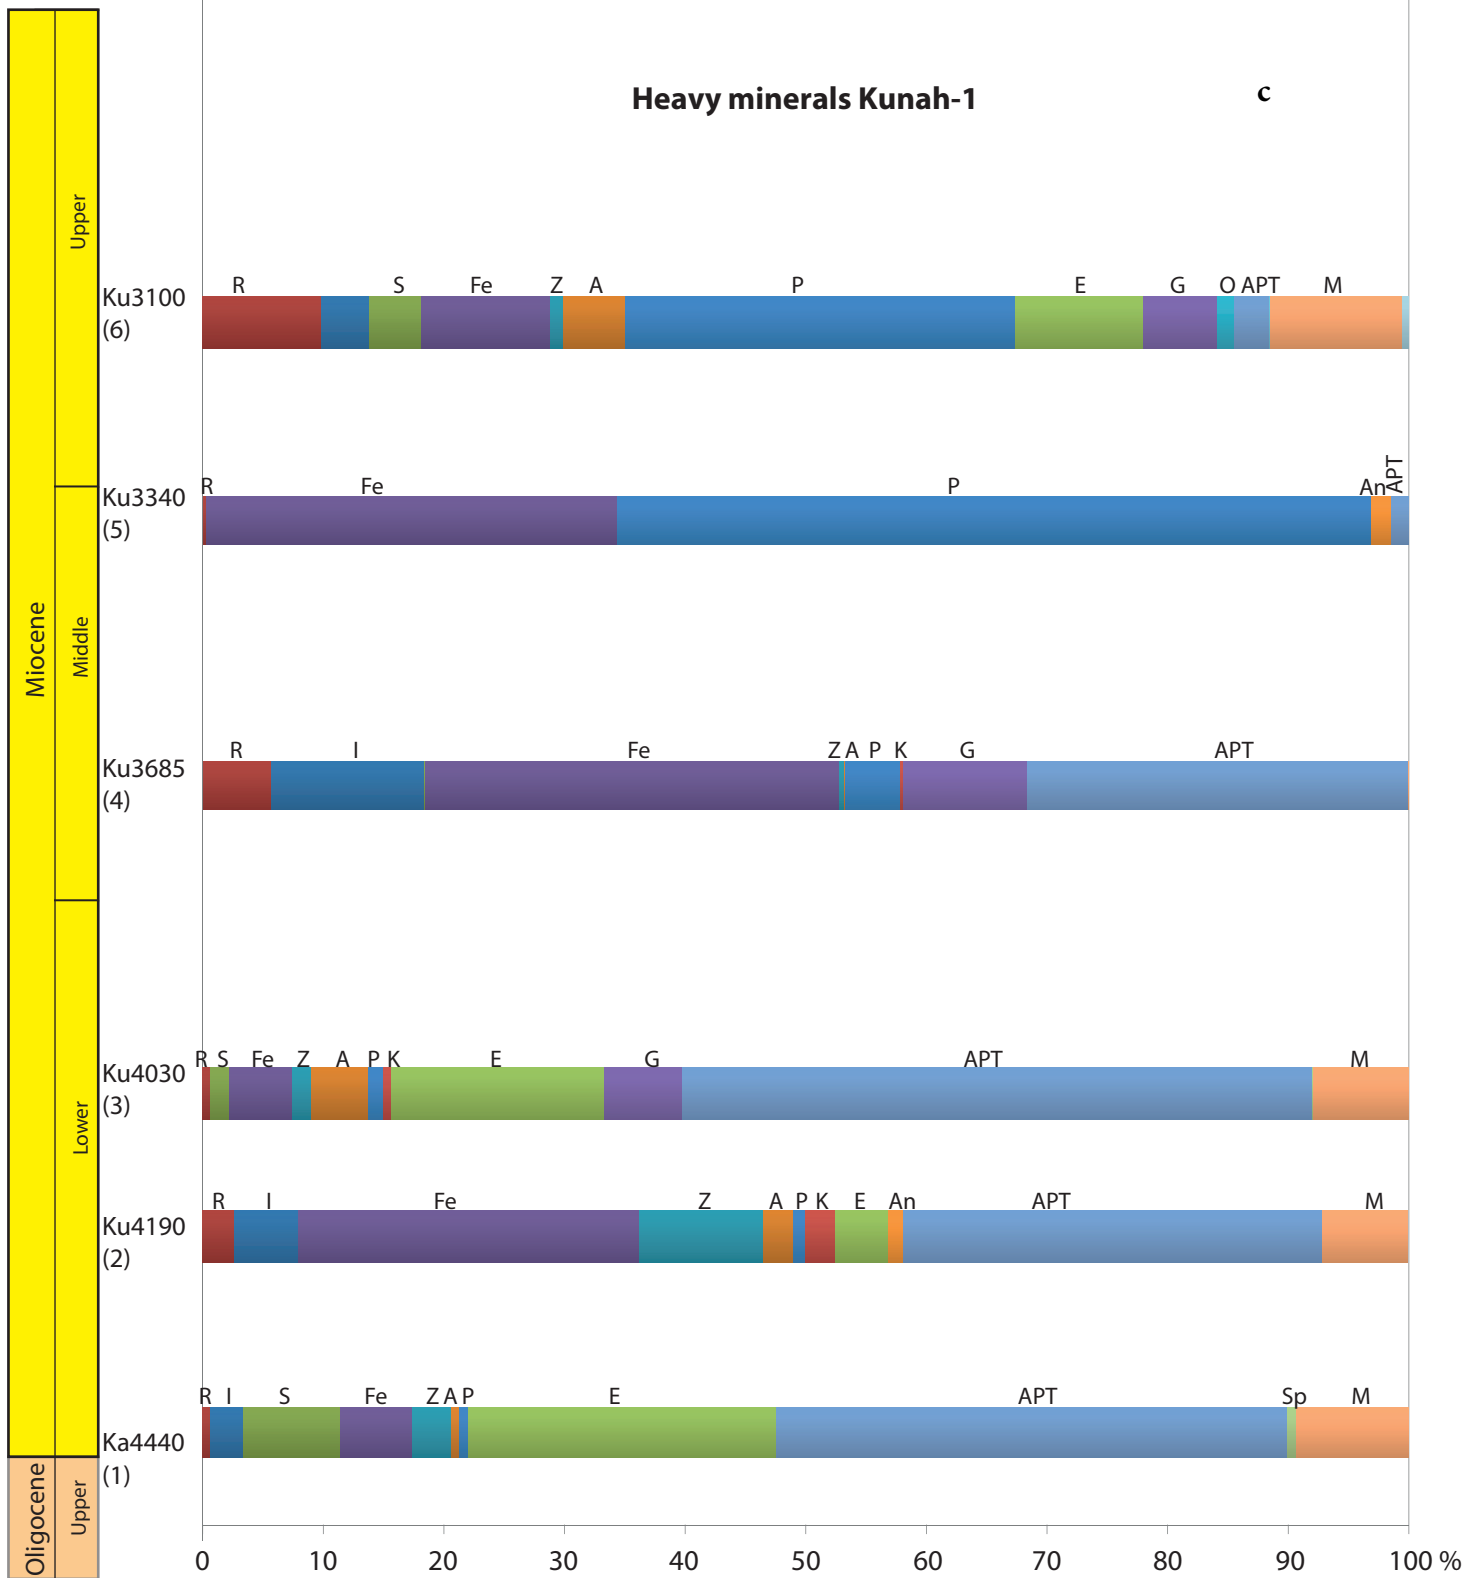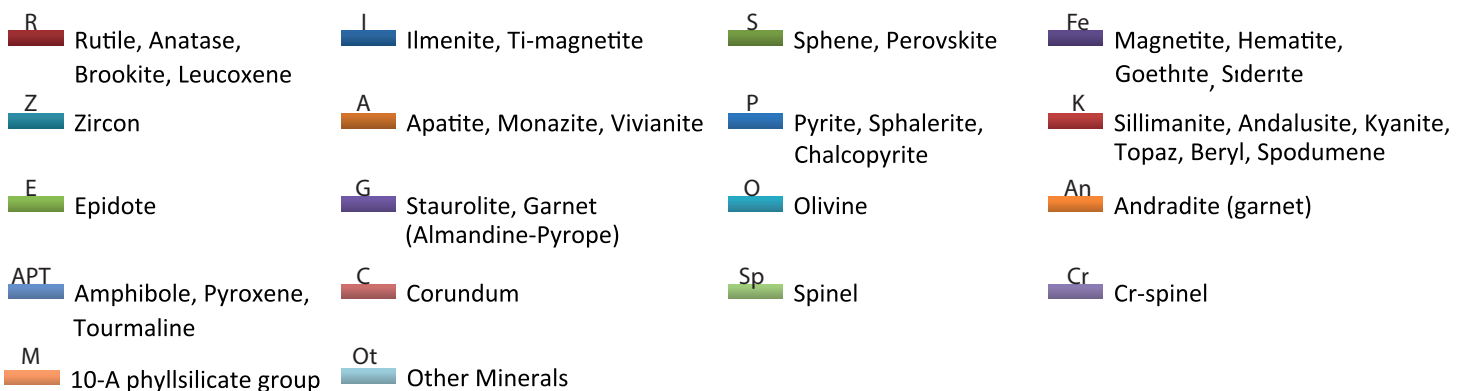

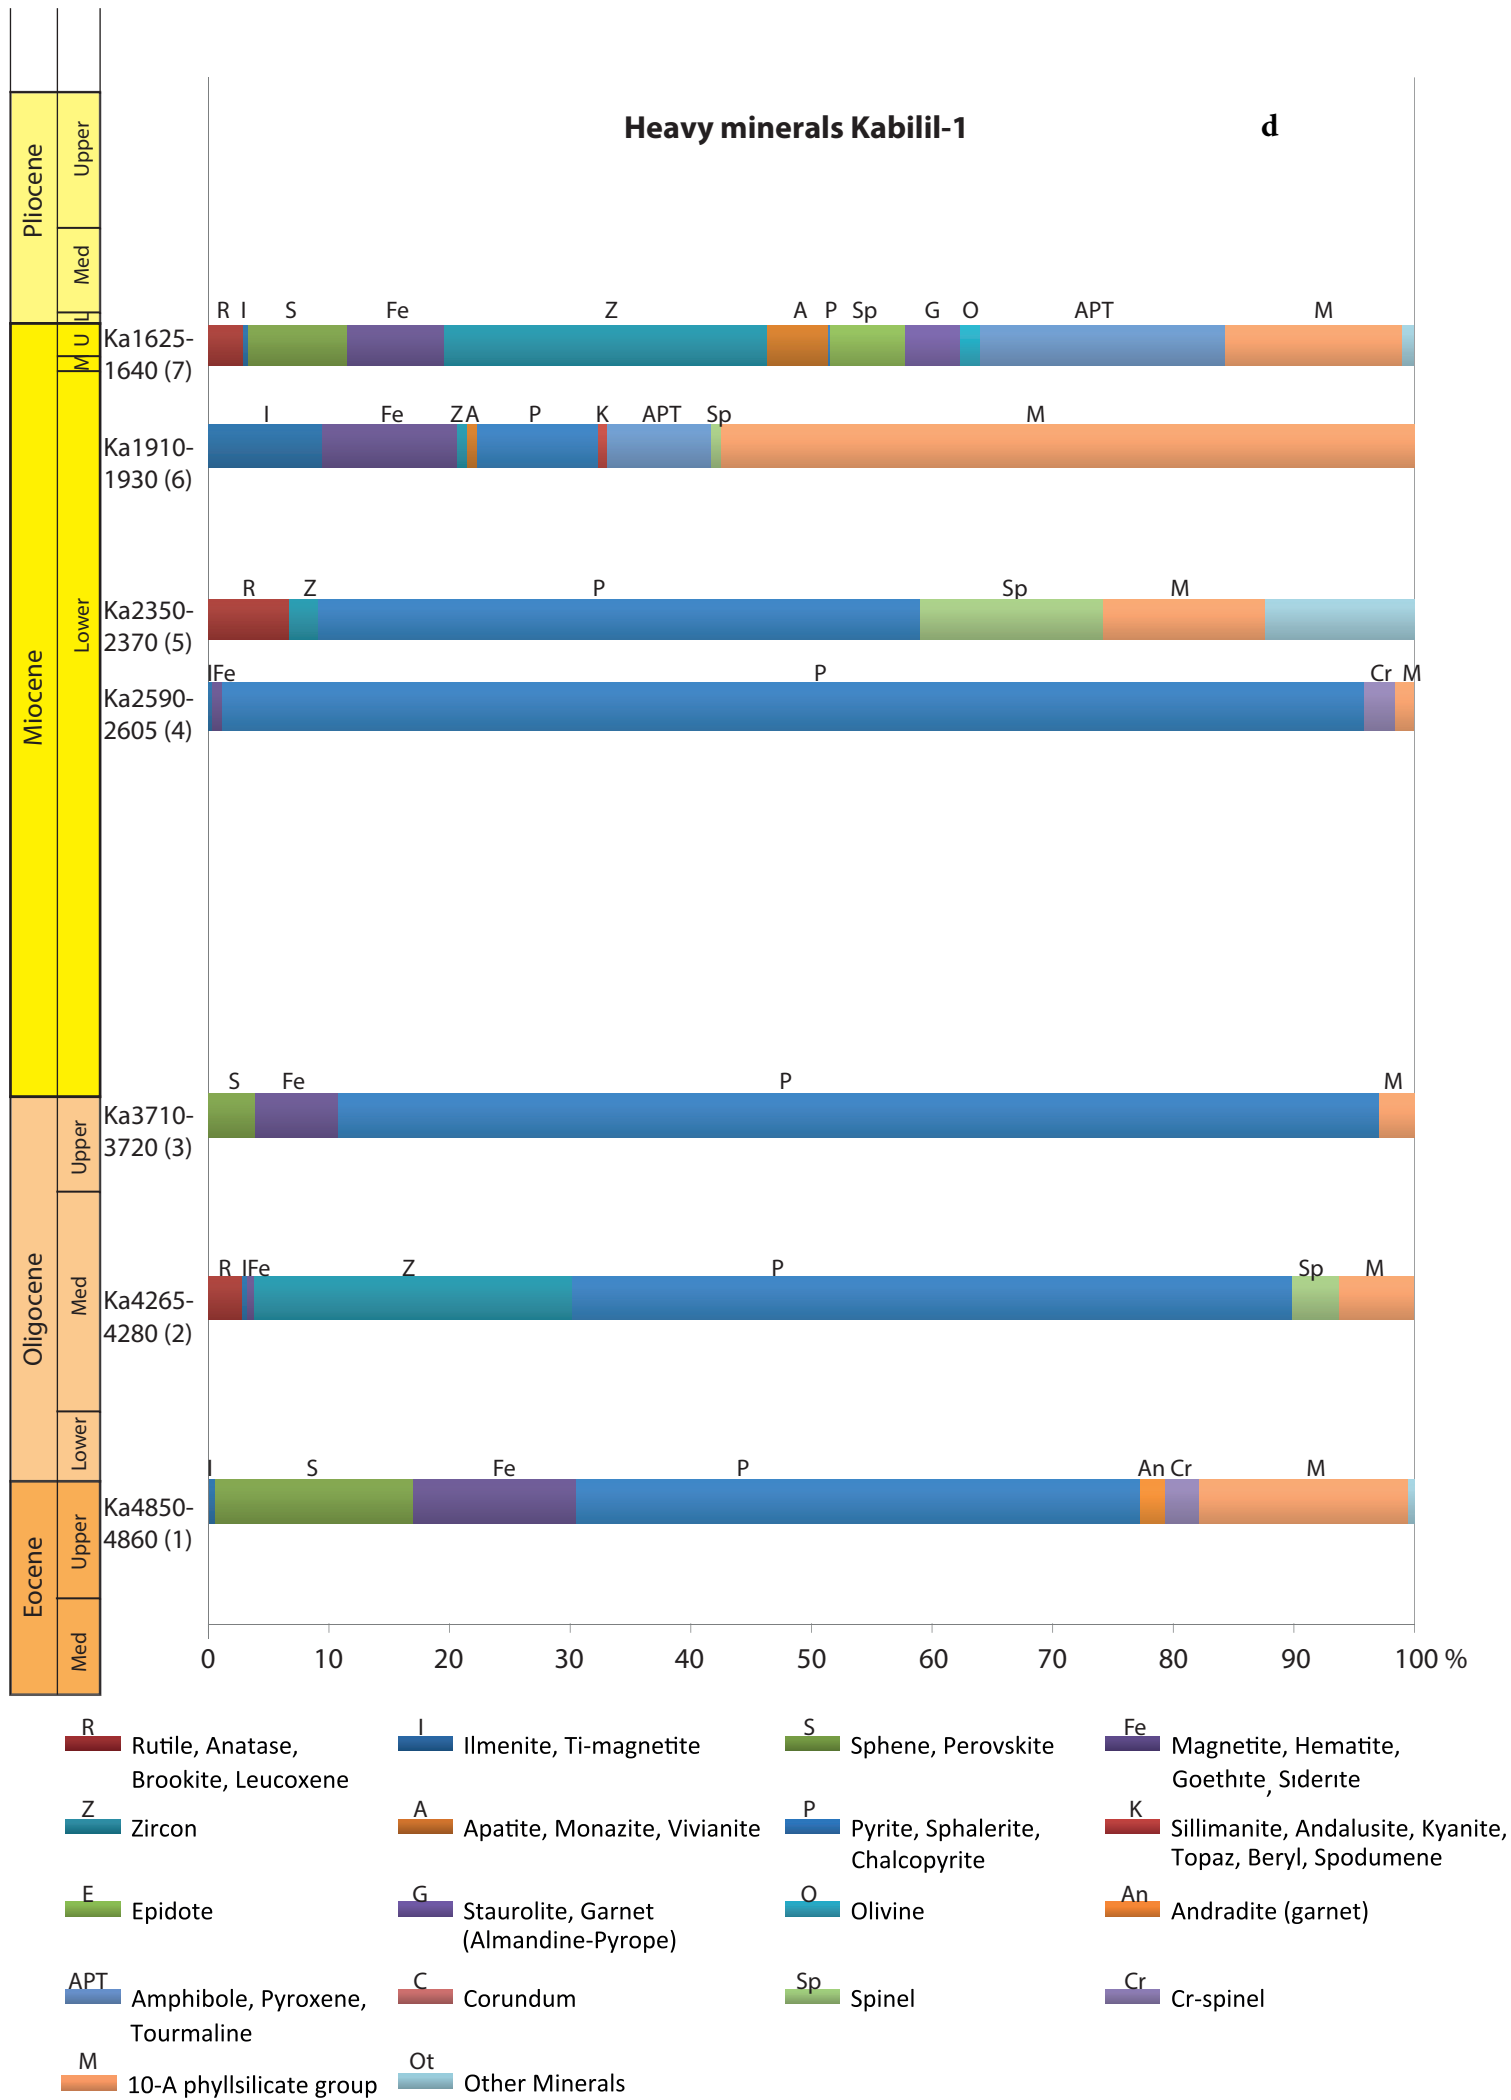

# Heavy minerals Chuktah-201

e

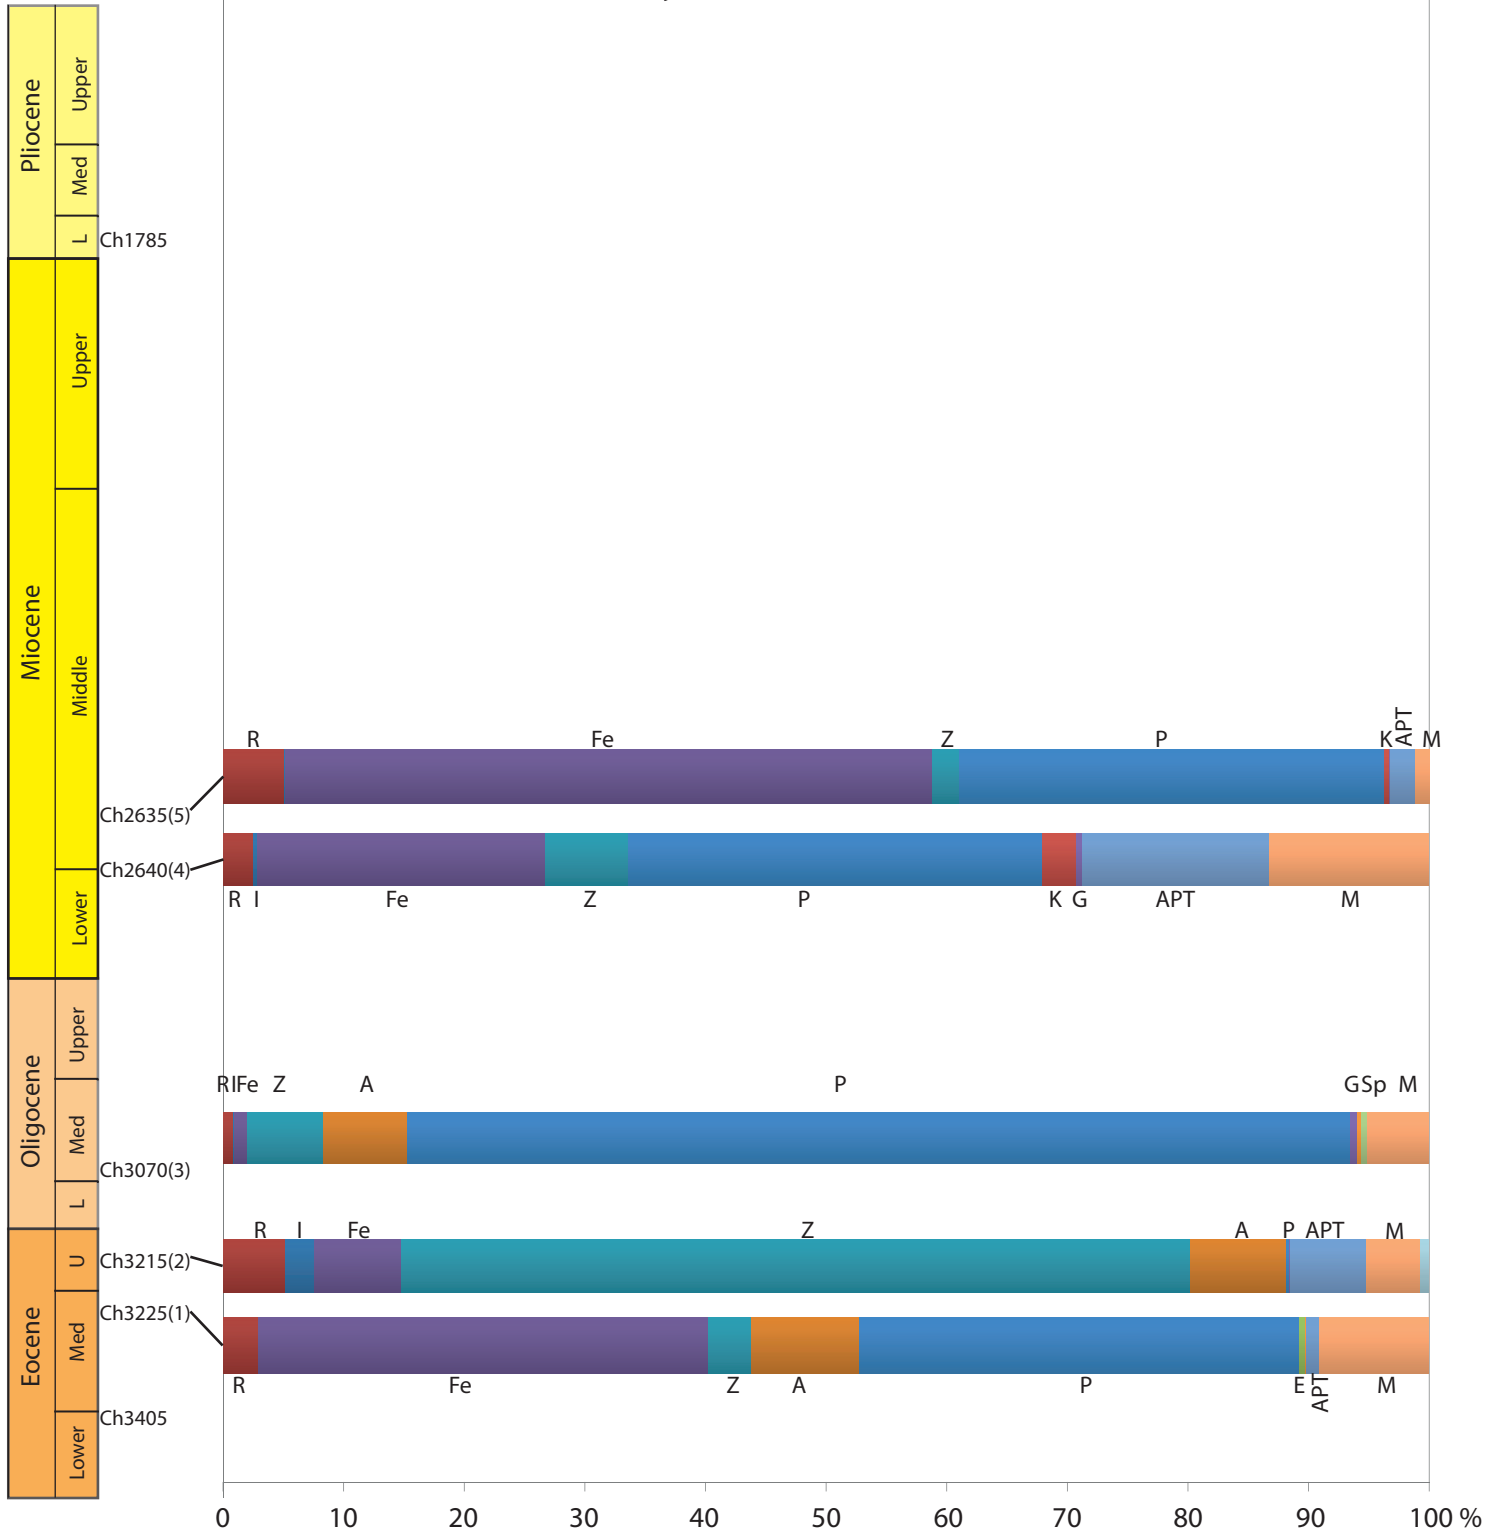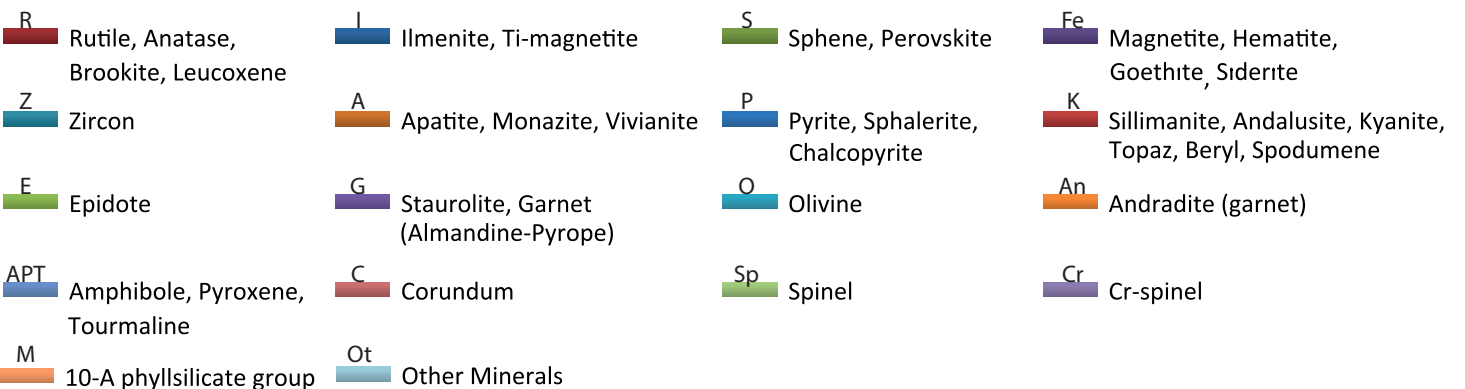

Supplement: Supplementary file 1 [file 1 › 546-09-SuppFig1.pdf]
